# Supplementary material
Source: publisher figshare collection journal article supplement (https://diabetesjournals.figshare.com/ndownloader/files/25810190)

**Figure S1. Patient education handout utilized by CPS**

## Diabetes increases your risk of heart attack and stroke

How can statins lower my risk?

- Diabetes is one of the major risk factors for heart disease
- Statins are prescription medications used to lower cholesterol levels in individuals with heart disease or those at increased risk of developing heart disease or stroke
- Common statins include rosuvastatin, atorvastatin, simvastatin, and pravastatin
- Statins have been shown to lower your chance of heart disease **regardless of your cholesterol levels.**
- It is important to continue taking your statin medication even if you feel well
- Do not stop taking this medication without talking to your doctor or pharmacist
- Always check with your doctor or pharmacist before starting a new medication, including over-the-counter medicines and vitamins/herbal supplements

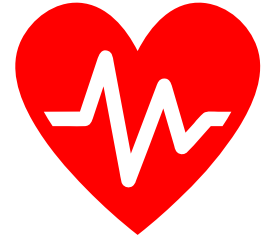

Image from Microsoft Word 2002

Call your doctor right away if you of the following after starting a statin:

- Have unexplained muscle pain or weakness
- Notice your urine (pee) is dark brown or coca-colored
- Notice your skin or the whites of your eyes become yellow
- Have very bad stomach pain or persistent vomiting
- Have a skin rash

How can I refill my prescription?

1. Call automated refill phone line
2. Online at [www.myhealth.va.gov](http://www.myhealth.va.gov)
3. Mail refill slip to the pharmacy
4. Place refill slip in mail slot in the pharmacy

**Figure S2. Incorporating the process into the current workflow of clinical pharmacist and potential utilization of clinical pharmacy technician for reviewing chart review components**

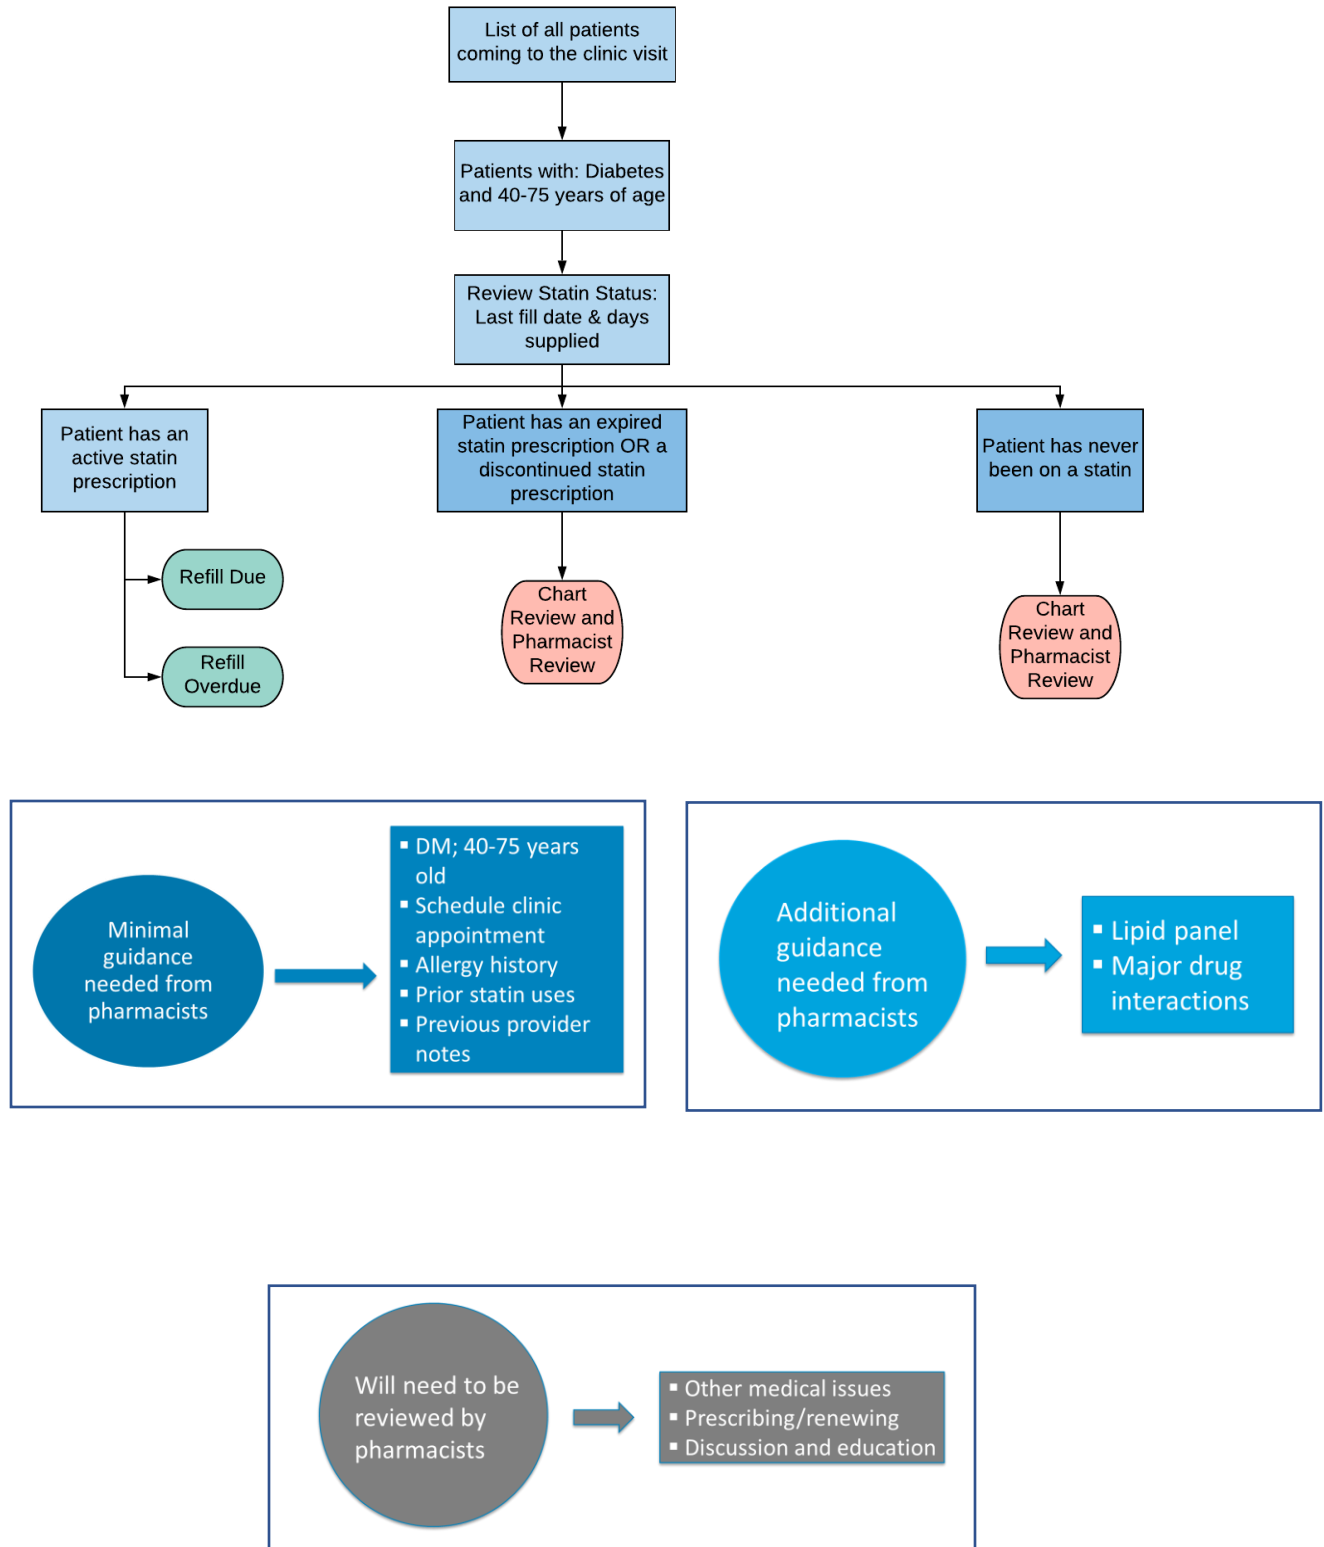

Supplement: Supplementary file 1 [file 25810190]
